# Supplementary material for: Monitoring of redox state in a dechlorinating culture with immobilized redox indicators
Source: Royal Society of Chemistry journal article supplement (doi:10.1039/b818487a), 2009-01-01
Supplement: b818487a.pdf [file b818487a.pdf]

Supplemental Materials:

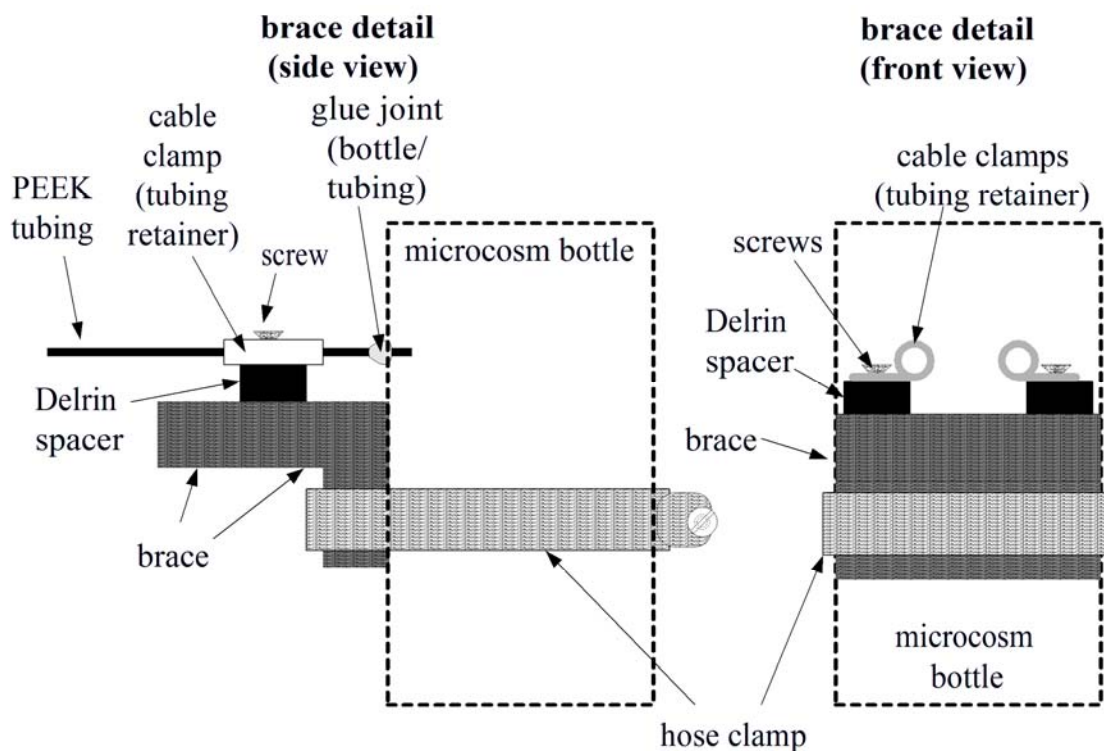

**Figure. 1-S.**

**Figure 1-S.** Detailed side and front views of tubing brace construction. The brace is made of Delrin and secured with a hose clamp to the outside of the bottle. The tubing brace is semi-circular and the inside edge has the same equivalent diameter as the bottle. A hose clamp attaches around the bottle and holds the brace on the lip. The tubing is secured with plastic cable clamps with eyelets. To allow for easy positioning the clamps are spaced above the brace with a machined Delrin washer. The clamps screw into the brace lip extending vertically from the bottle surface.
